# Supplementary material for: Integrative analysis of the cancer genome atlas and cancer cell lines encyclopedia large-scale genomic databases: MUC4/MUC16/MUC20 signature is associated with poor survival in human carcinomas
Source: PubMed Central journal article supplement (PMC6149062; doi:10.1186/s12967-018-1632-2), 2018-09-20

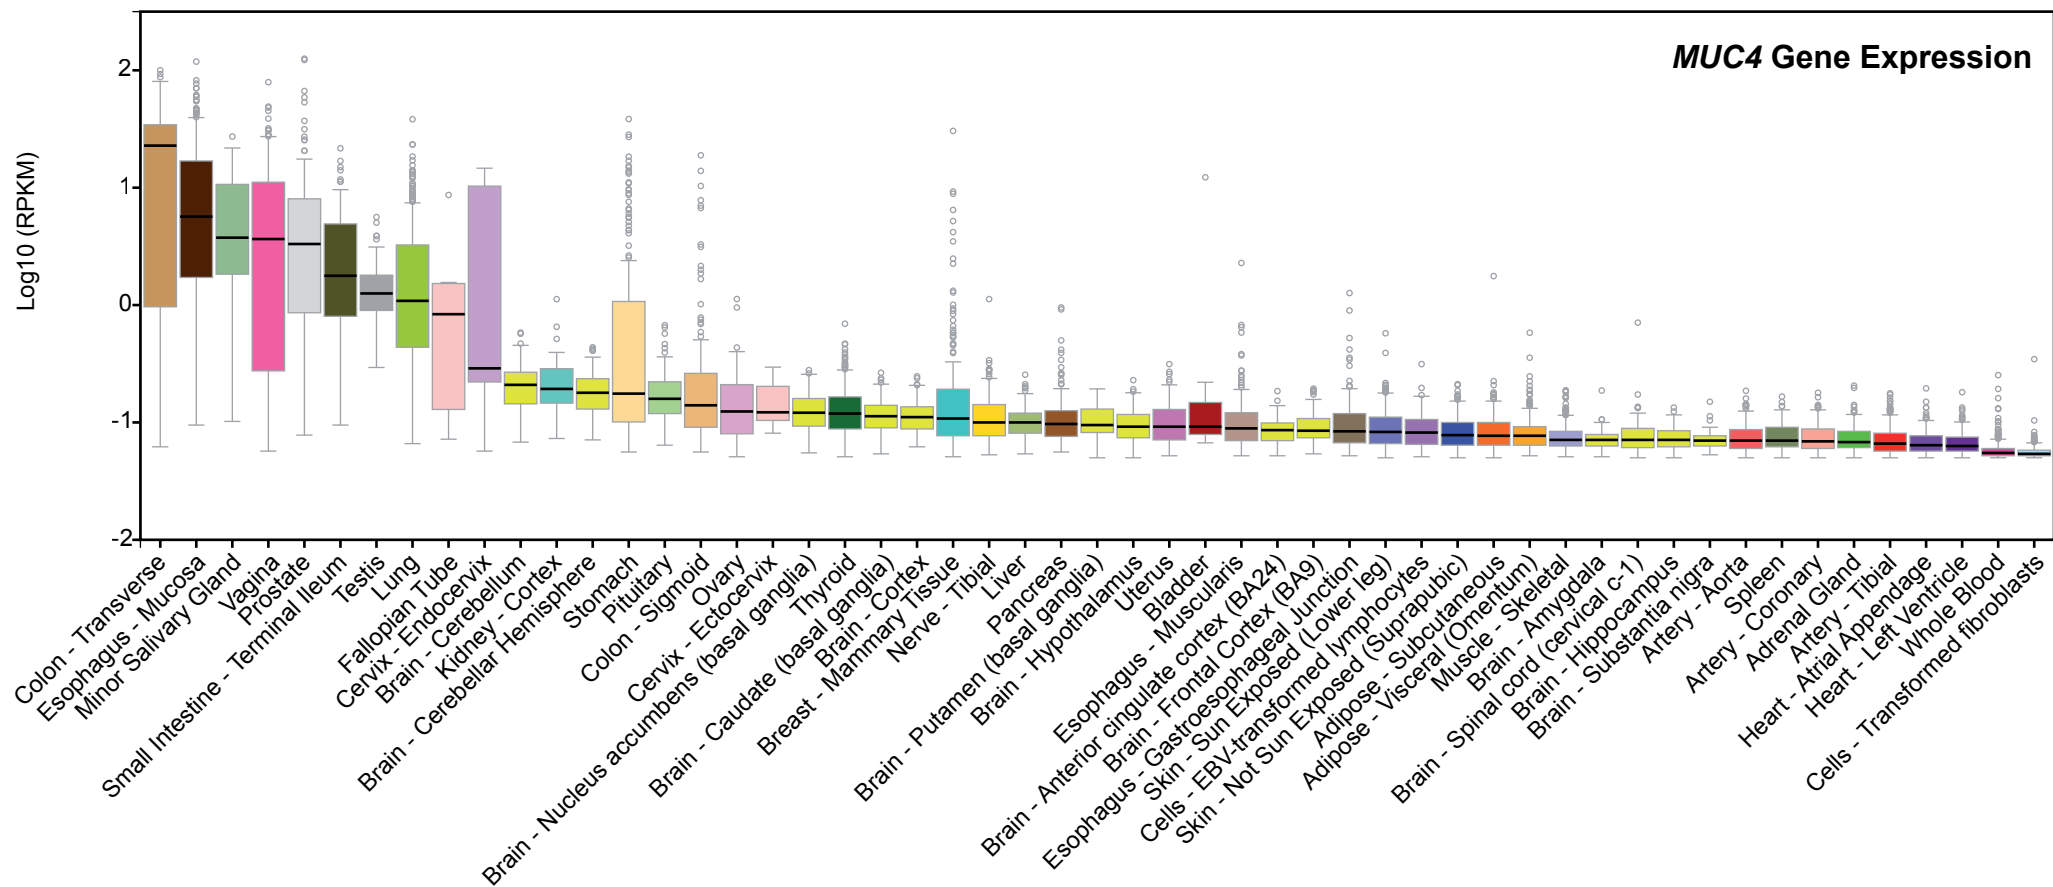

Supplement: 12967_2018_1632_MOESM2_ESM.pdf [file 12967_2018_1632_MOESM2_ESM.pdf]
