# Supplementary material for: Integrative analysis of the cancer genome atlas and cancer cell lines encyclopedia large-scale genomic databases: MUC4/MUC16/MUC20 signature is associated with poor survival in human carcinomas
Source: Springer Nature journal article supplement (doi:10.1186/s12967-018-1632-2), 2018-09-20

**A**

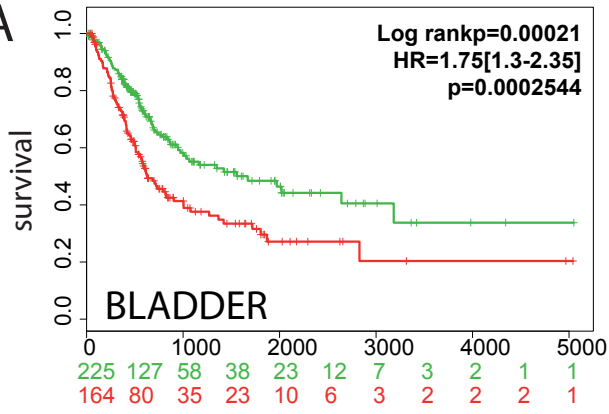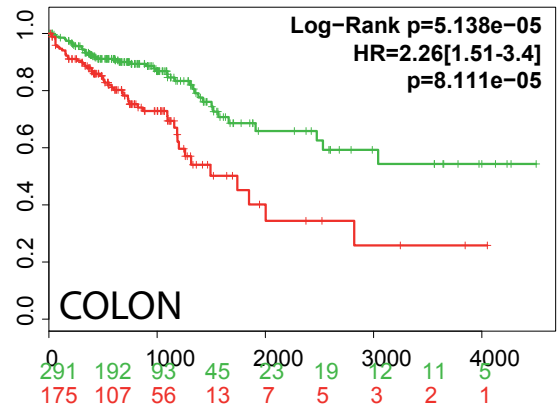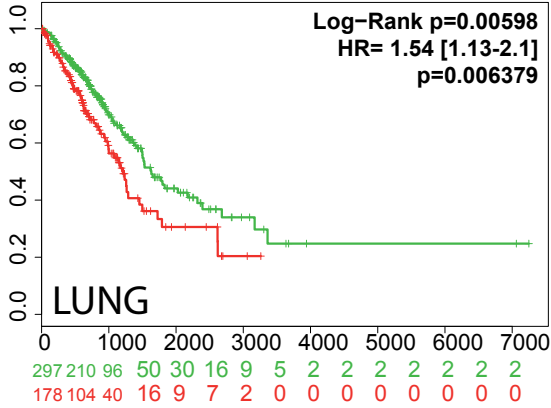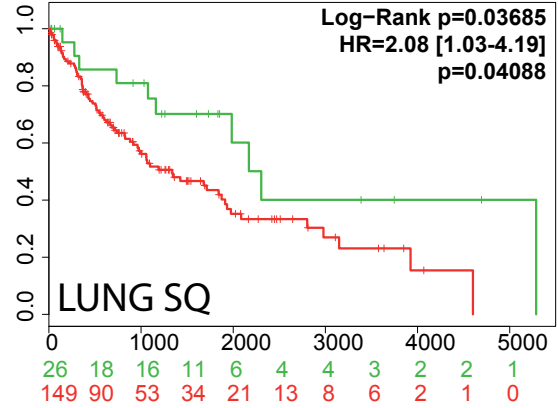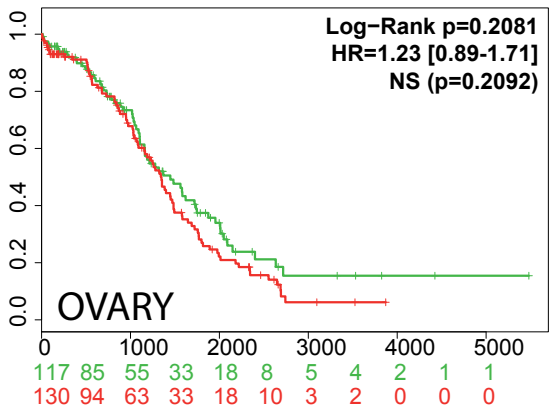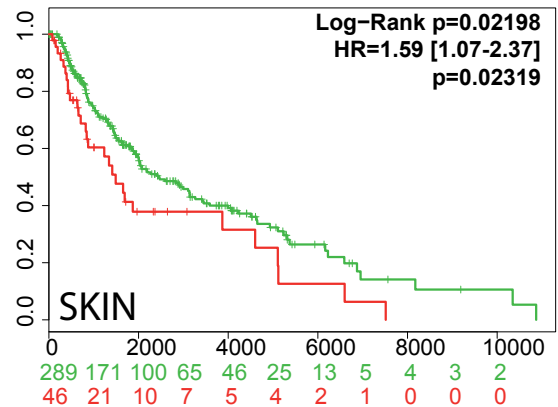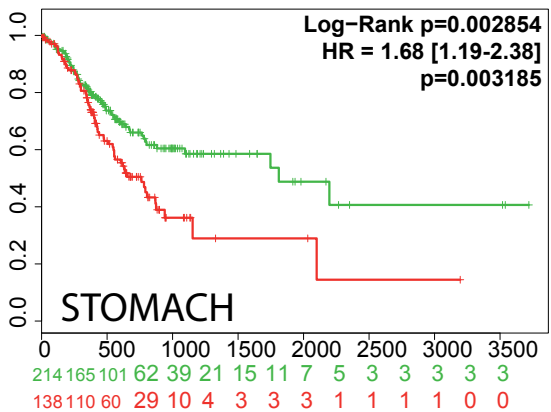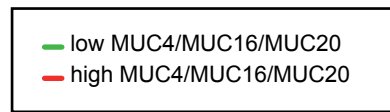

**B**

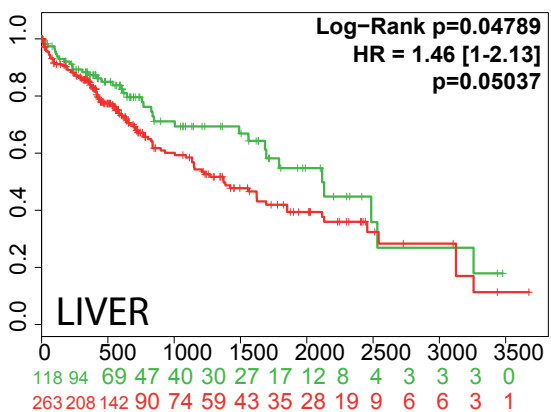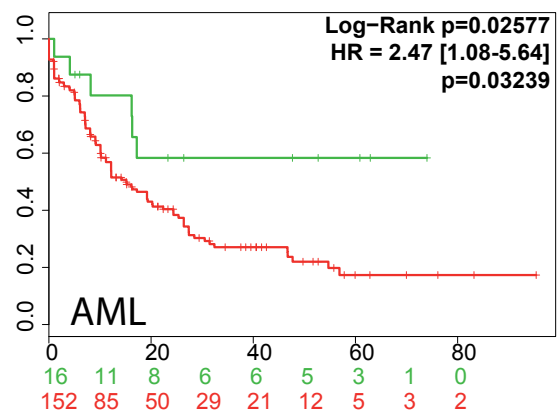

Supplement: MOESM8 [file 16139972]
